# Supplementary material for: CeO2-rGO Composites for Photocatalytic H2 Evolution by Glycerol Photoreforming
Source: MDPI journal article supplement (doi:10.3390/ma16020747), 2023-01-12
Supplement: s1 [file s1]

# CeO<sub>2</sub>-rGO Composites for Photocatalytic H<sub>2</sub> Evolution by Glycerol Photoreforming

Stefano Andrea Balsamo<sup>1\*</sup>, Eleonora La Greca<sup>2</sup>, Marta Calà Pizzapilo<sup>1</sup>, Salvatore Sciré<sup>1</sup> and Roberto Fiorenza<sup>1</sup>

<sup>1</sup> Department of Chemical Sciences, University of Catania, Viale A. Doria 6, 95125 Catania, Italy; marta.cala20@gmail.com (M.C.P.); sscire@unict.it (S.S.); rfiorenza@unict.it (R.F.)

<sup>2</sup> Institute for The Study of Nanostructured Materials (ISMN)-CNR, Via Ugo La Malfa 153, 90146 Palermo, Italy; eleonora.lagreca@hotmail.it

\* Correspondence: stefano.balsamo@phd.unict.it; Tel.: +39-333-821-5178

## SUPPLEMENTARY MATERIALS

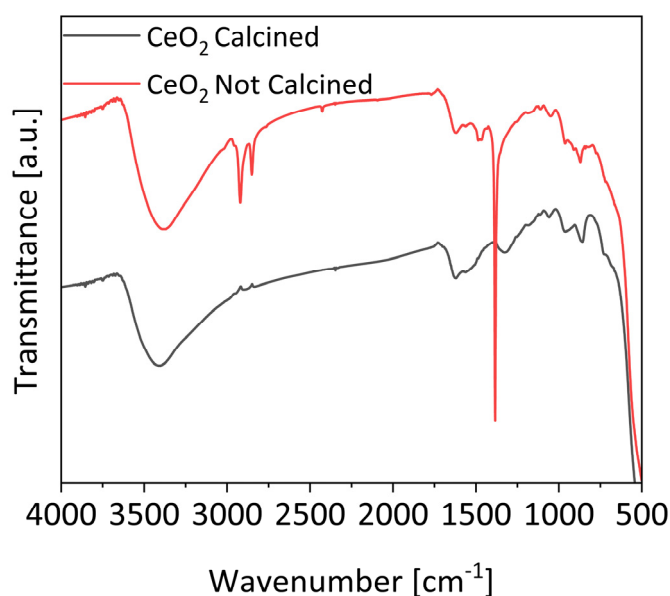

**Figure S1.** FTIR spectra of the CeO<sub>2</sub> samples before and after the calcination.

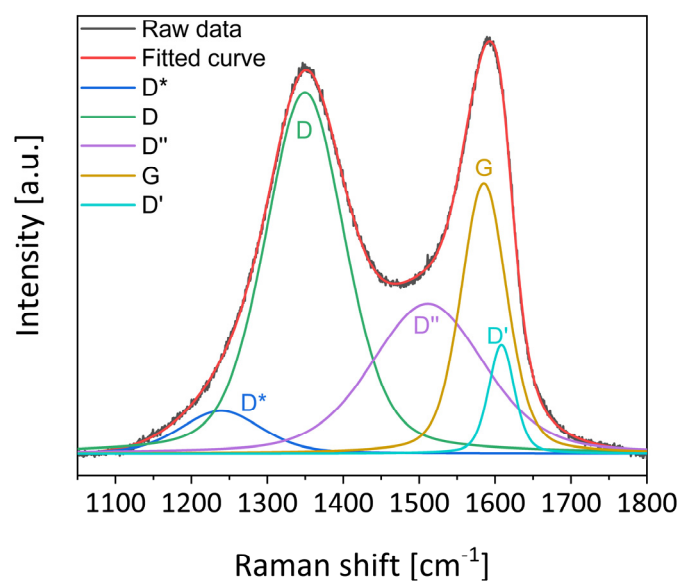

**Figure S2.** Raman signals deconvolution of D and G bands in their five different components for the bare GO as representative sample.

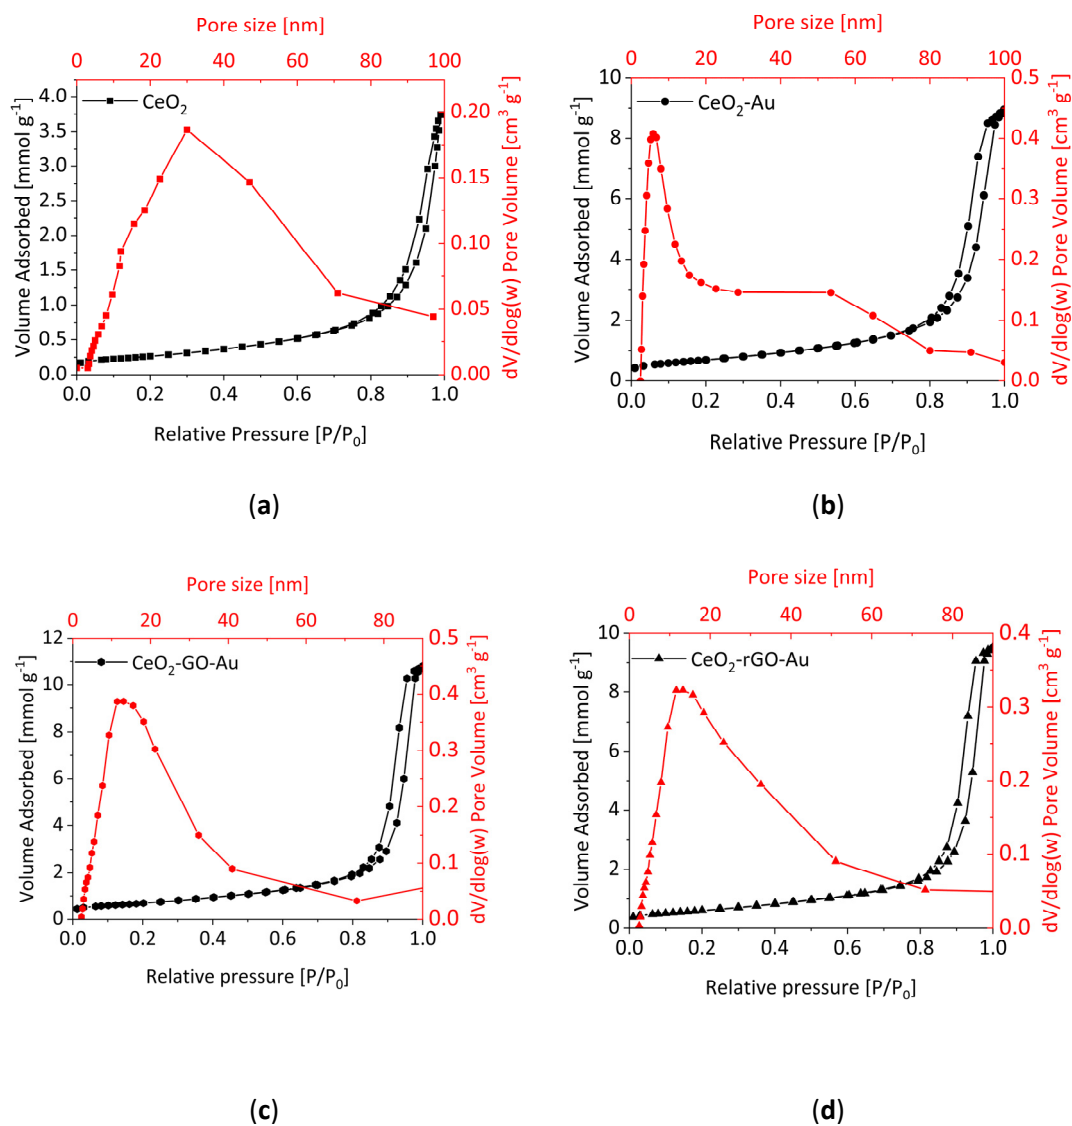

**Figure S3.** N<sub>2</sub> adsorption-desorption isotherms and pore size distribution of: (a) CeO<sub>2</sub>, (b) CeO<sub>2</sub>-Au, (c) CeO<sub>2</sub>-GO-Au and (d) CeO<sub>2</sub>-rGO-Au.

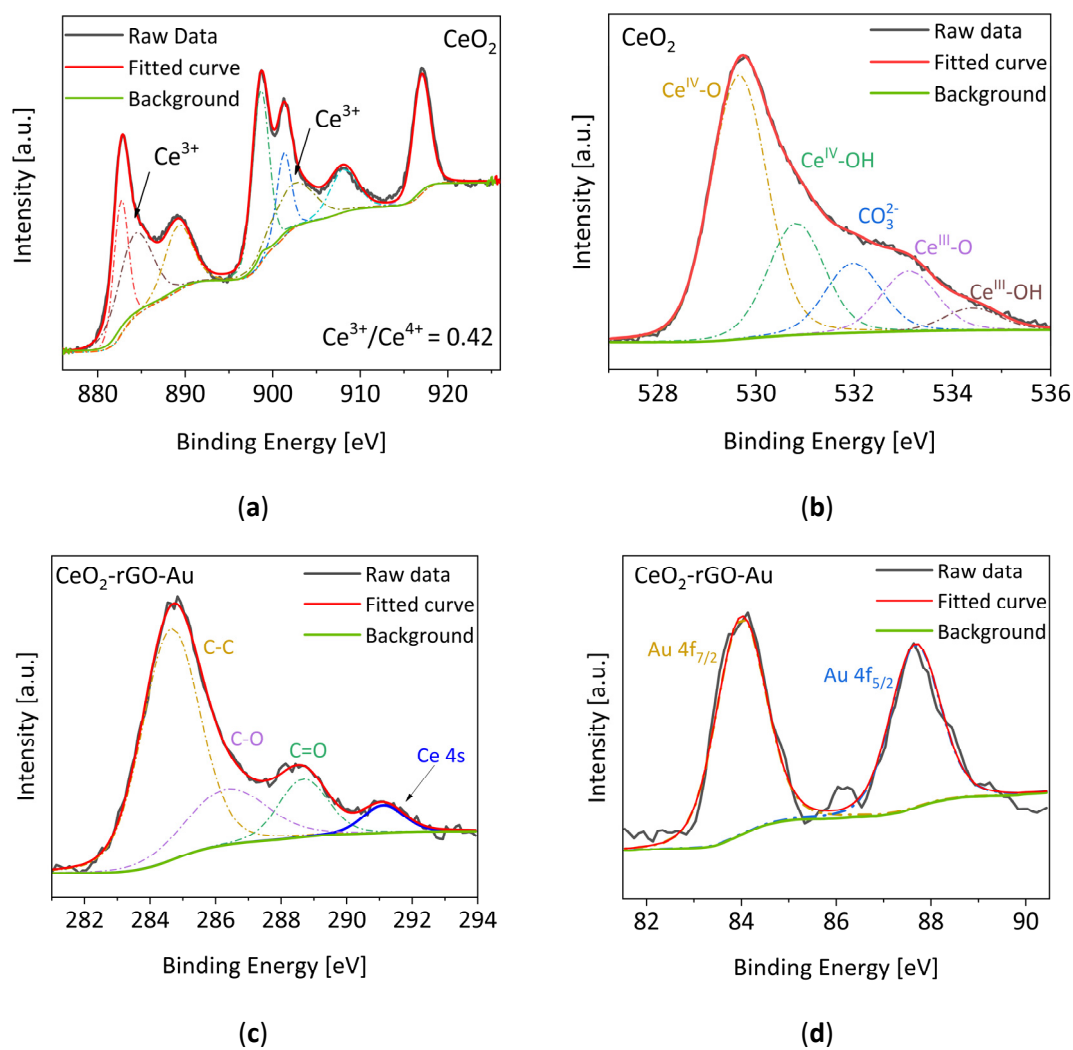

**Figure S4.** XPS spectra of: (a) Ce 3d of bare CeO<sub>2</sub>, (b) O 1s of bare CeO<sub>2</sub>, (c) C 1s of CeO<sub>2</sub>-rGO-Au and (d) Au 4f of CeO<sub>2</sub>-rGO-Au.

**Table S1** XPS signals deconvolution. The values are in binding energy (eV).

| Sample                   | Ce 3d (eV)                                                   | O 1s (eV)                            | Au 4f (eV) |
|--------------------------|--------------------------------------------------------------|--------------------------------------|------------|
| CeO <sub>2</sub>         | 881.7, 883.5, 888.3,<br>897.6, 900.3, 901.8,<br>907.1, 916.0 | 529.7, 530.8, 532.8,<br>533.1, 534.4 | /          |
| CeO <sub>2</sub> -GO     | 881.9, 883.7, 888.3,<br>897.7, 900.2, 902.0,<br>907.3, 916.3 | 529.6, 530.7, 532.5,<br>532.9, 534.2 | /          |
| CeO <sub>2</sub> -rGO    | 881.5, 883.4, 888.2,<br>897.6, 900.2, 901.7,<br>906.9, 915.9 | 529.8, 531.0, 532.7,<br>533.0, 534.4 | /          |
| CeO <sub>2</sub> -GO-Au  | 881.7, 883.4, 888.2,<br>897.6, 900.2, 901.9,<br>907.1, 916.0 | 529.7, 530.7, 532.6,<br>533.2, 534.3 | 84.0, 87.5 |
| CeO <sub>2</sub> -rGO-Au | 881.6, 883.4, 888.2,<br>897.6, 900.1, 901.7,<br>907.0, 916.0 | 529.7, 530.8, 532.7,<br>533.0, 534.3 | 84.0, 87.5 |
